# Supplementary material for: PD-L1 (CD274) and PD-L2 (PDCD1LG2) promoter methylation is associated with HPV infection and transcriptional repression in head and neck squamous cell carcinomas
Source: PubMed Central journal article supplement (PMC5787495; doi:10.18632/oncotarget.23080), 2017-12-07
Supplement: oncotarget-09-641-s001.pdf [file oncotarget-09-641-s001.pdf]

## ***PD-L1 (CD274) and PD-L2 (PDCD1LG2) promoter methylation is associated with HPV infection and transcriptional repression in head and neck squamous cell carcinomas***

### **SUPPLEMENTARY MATERIALS**

**Supplementary Table 1: TCGA Cohort.** See Supplementary\_Table\_1

**Supplementary Table 2: UKB Cohort.** See Supplementary\_Table\_2
